# Supplementary material for: Intracellular signaling prevents effective blockade of oncogenic gp130 mutants by neutralizing antibodies
Source: PubMed Central journal article supplement (PMC4007646; doi:10.1186/1478-811x-12-14), 2014-03-10

WTgp130-YFP

CAgp130-YFP

+ dox  
+ MeOH

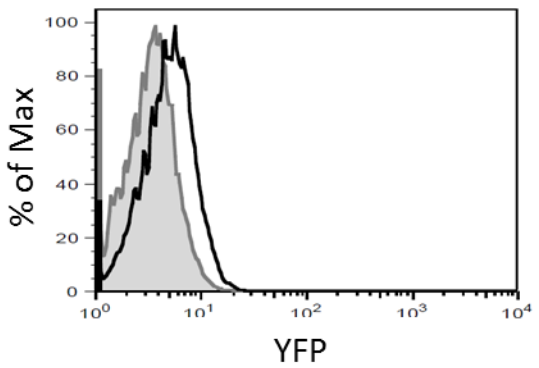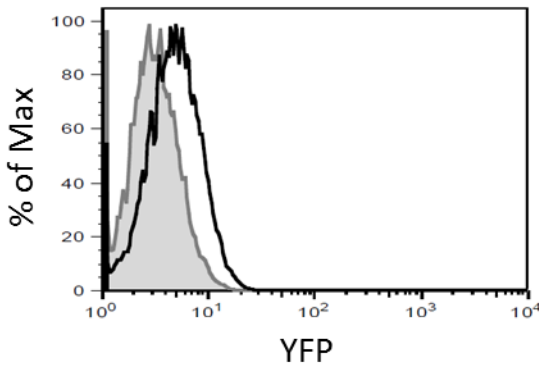

■ - dox  
□ + 8 h treatment

+ dox  
+ brefeldin A

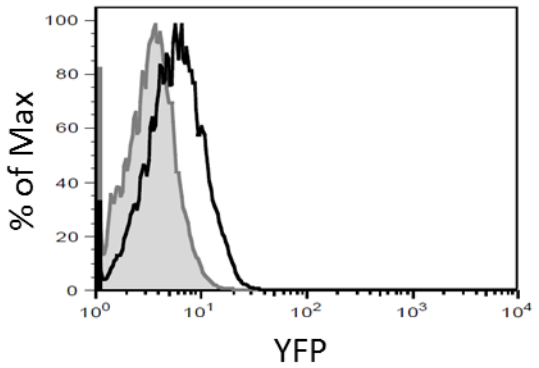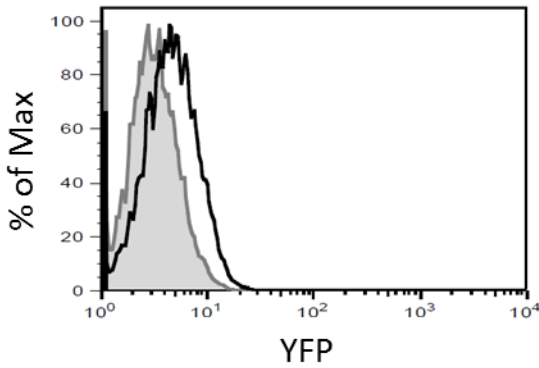

Supplement: 1478-811X-12-14-S1.pdf [file 1478-811X-12-14-S1.pdf]
