# Supplementary material for: Intracellular signaling prevents effective blockade of oncogenic gp130 mutants by neutralizing antibodies
Source: PubMed Central journal article supplement (PMC4007646; doi:10.1186/1478-811x-12-14), 2014-03-10

# Additional file2

## T-REx-293-WTgp130-YFP

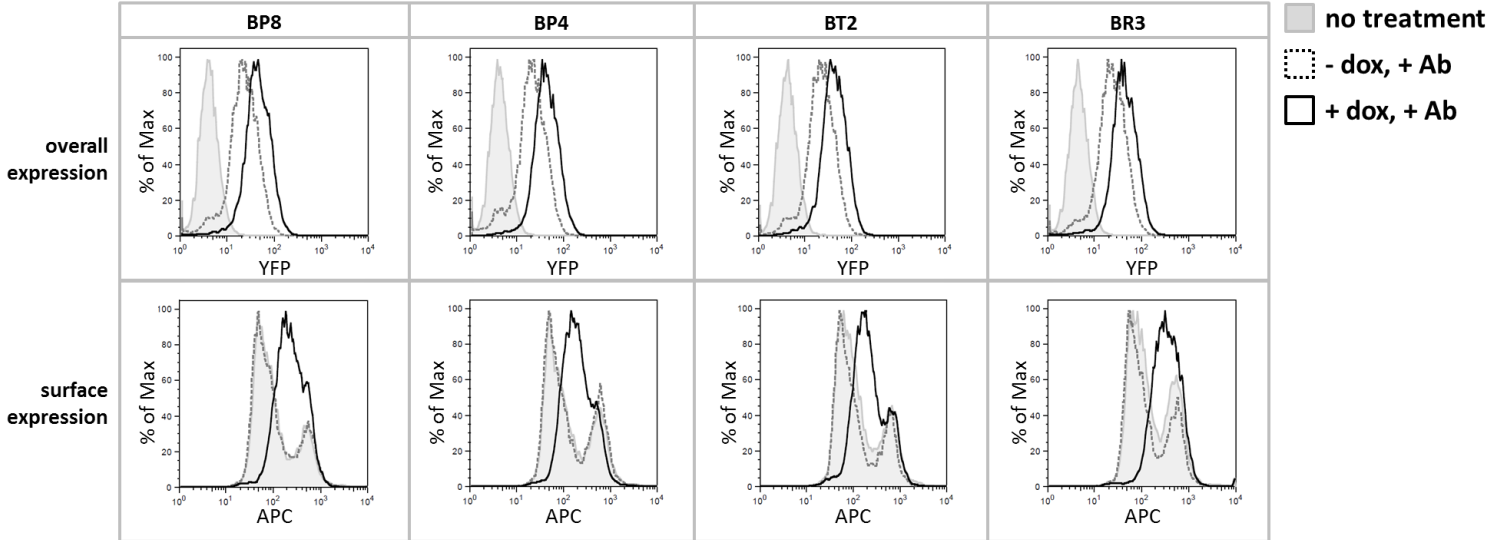

## T-REx-293-CAgp130-YFP

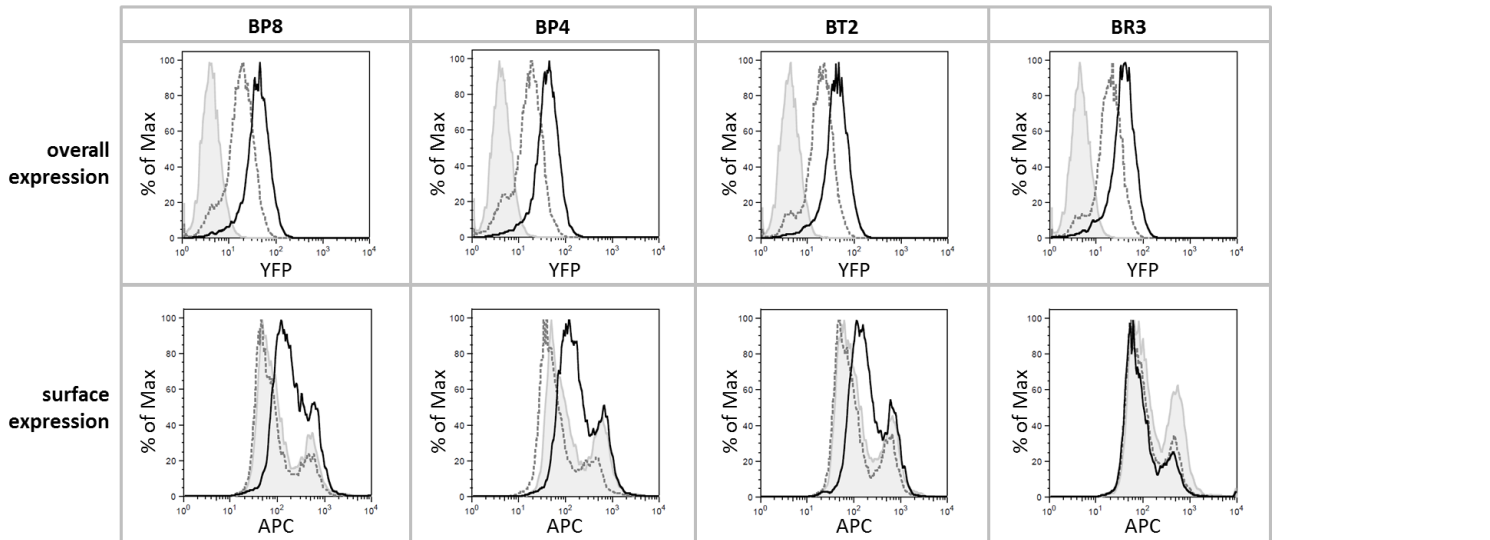

Supplement: 1478-811X-12-14-S2.pdf [file 1478-811X-12-14-S2.pdf]
